# Supplementary material
Source: PubMed Central journal article supplement (PMC3647236)
Supplement: cdd201310x2.pdf [file cdd201310x2.pdf]

a

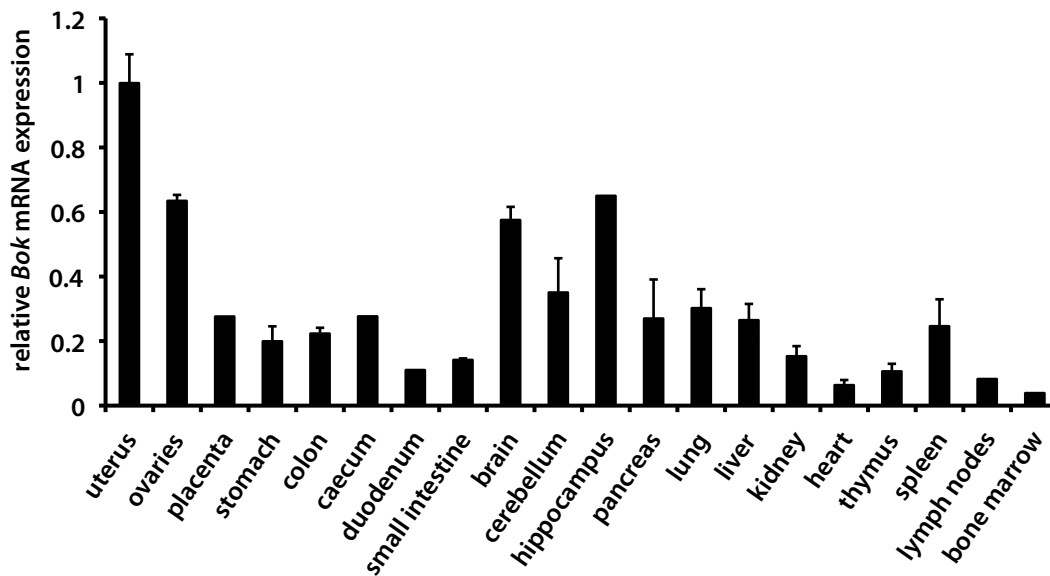

b

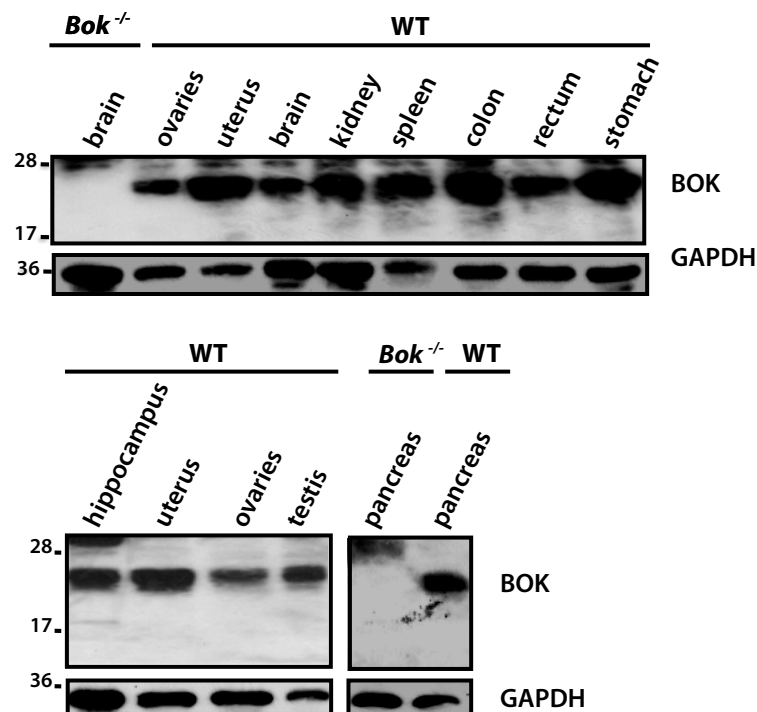

**Supplementary Figure S1. BOK is widely expressed in mice.** (a) Quantitative RT-PCR (qPCR) of *Bok* mRNA levels in different mouse organs (mixed gender, 6-12 weeks old mice): small intestine, colon, stomach, spleen, thymus, heart, kidney, liver, lung, pancreas, cerebellum, brain, ovaries, uterus (n=3) and hippocampus, caecum, duodenum, bone marrow, lymph nodes and placenta (n=2). *Hprt* served as reference gene and values were normalized to *Bok* levels in the uterus. (b) BOK immunoblots of tissue lysates derived from C57BL/6 WT mice. Brain and pancreatic lysates from *Bok*<sup>-/-</sup> mice served as specificity control for the BOK antibody. Re-probing of the membrane with a GAPDH-specific antibody served as loading control.
