# Supplementary material
Source: PubMed Central journal article supplement (PMC3647236)
Supplement: cdd201310x4.pdf [file cdd201310x4.pdf]

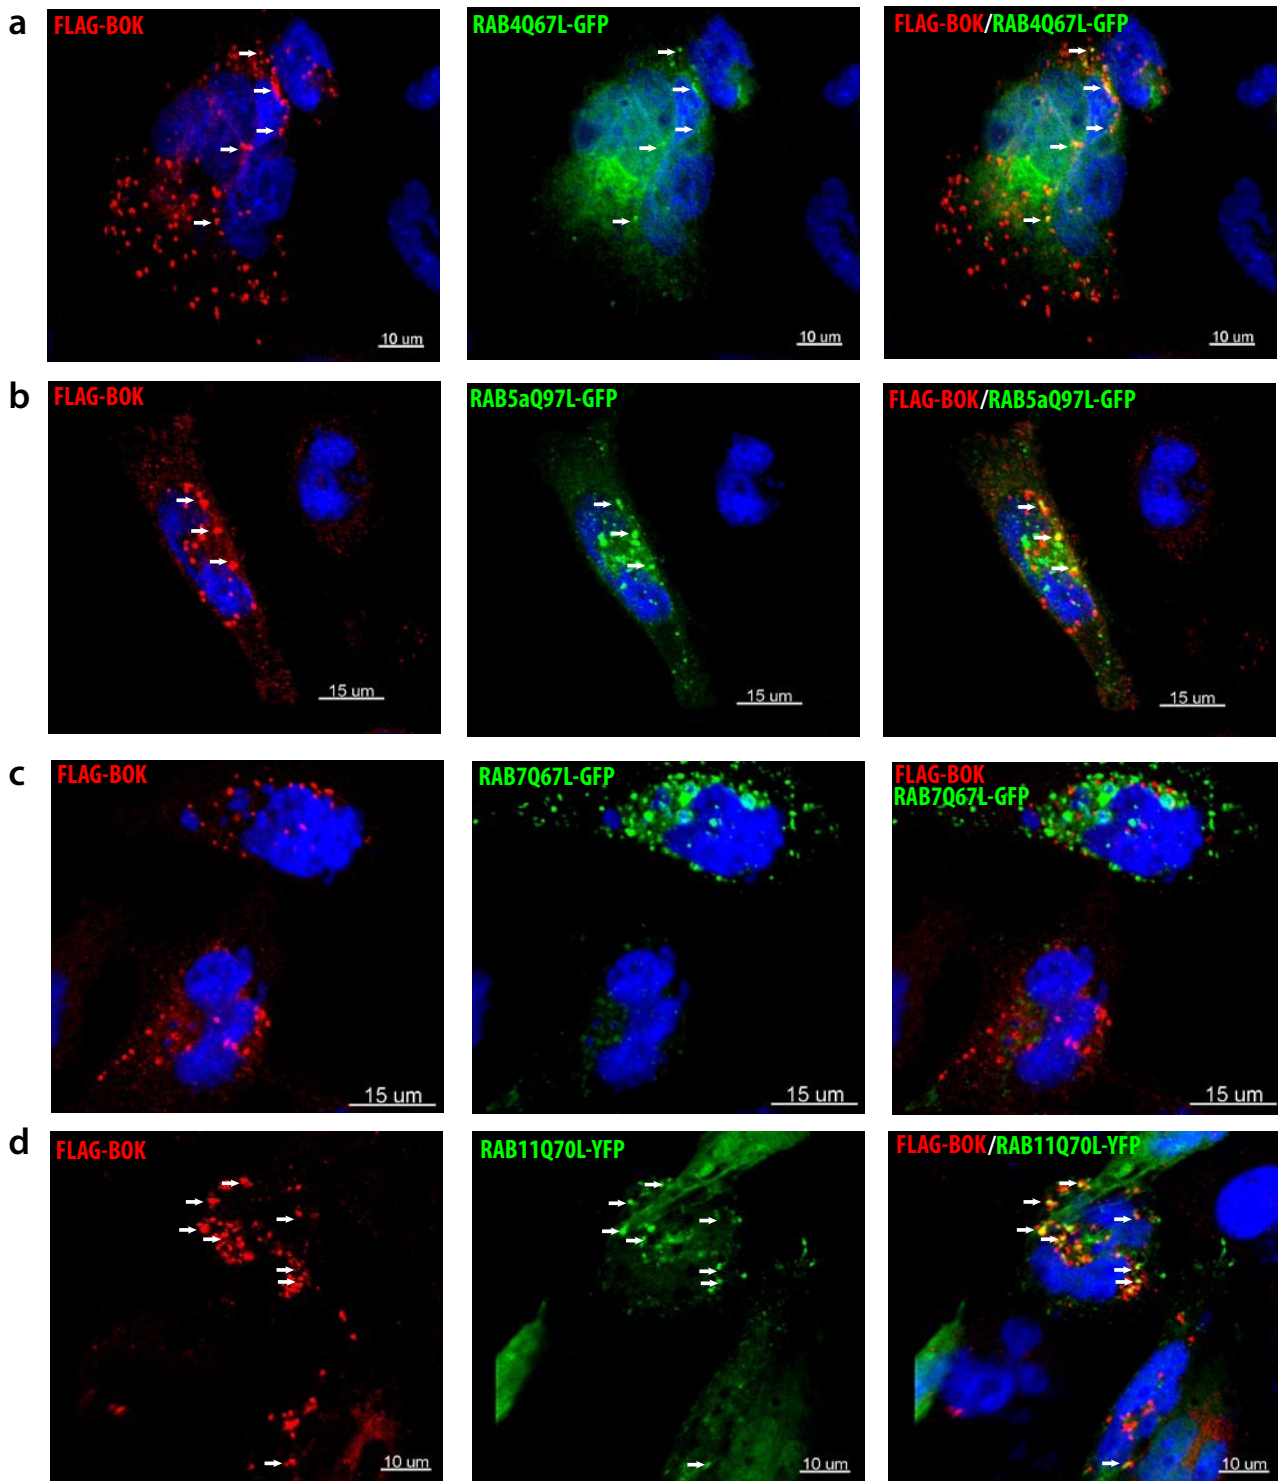

**Supplementary Figure S4. BOK present on vesicular structures partially co-localizes with early and late endosomal markers.** Confocal scanning micrographs of HeLa cells treated with 25  $\mu$ M Q-VD-Oph and co-transfected for 21 h with expression constructs for FLAG-BOK/pcDNA3 (red) and early endosome/recycle marker RAB4Q67L-GFP (**a**), late endosome marker RAB5aQ97L-GFP (**b**), late endosome/lysosome marker RAB7Q67L-GFP (**c**) and early endosome marker RAB11Q70L-YFP (**d**). Constitutive active RAB mutants were used. Vesicular BOK partially co-localizes with the early endosome markers RAB4, RAB11 and with the late endosome marker RAB5a but not with the late endosome and lysosome marker RAB7 as indicated by the white arrows.
