# Supplementary material
Source: PubMed Central journal article supplement (PMC3647236)
Supplement: cdd201310x5.pdf [file cdd201310x5.pdf]

SV40 MEF

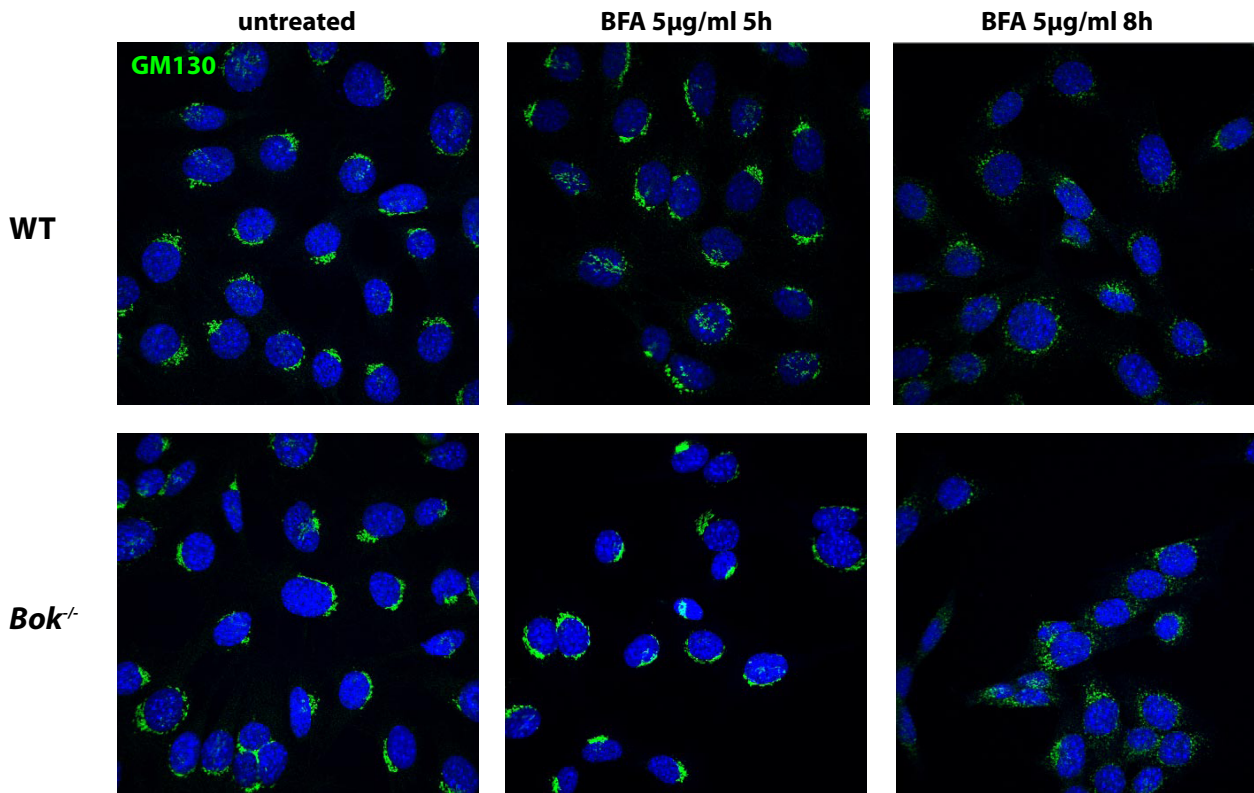

**Supplementary Figure S5. Brefeldin A-induced Golgi fragmentation is independent of BOK.**

Confocal scanning micrographs of SV40 immortalized WT and *Bok*<sup>-/-</sup> MEF treated for the indicated times with brefeldin A (BFA, 5 µg/mL) and stained with an antibody against the cis-Golgi matrix protein GM130 (green). Nuclear DNA was stained with Hoechst 33342 dye (blue).
