# Supplementary material
Source: PubMed Central journal article supplement (PMC3647236)
Supplement: cdd201310x6.pdf [file cdd201310x6.pdf]

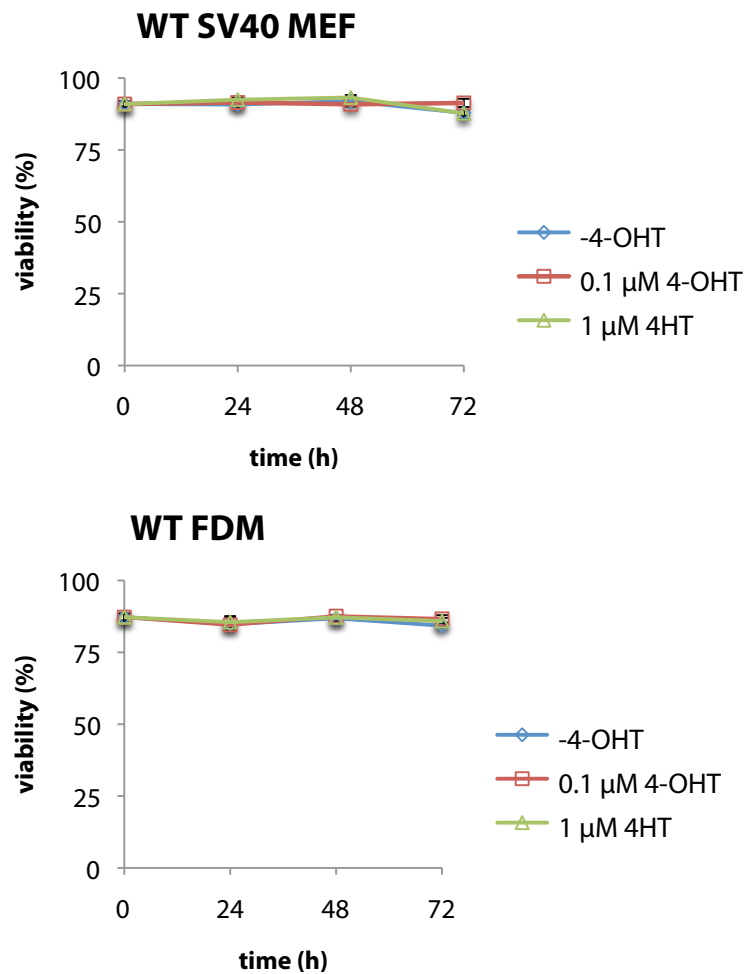

**Supplementary Figure S2. 4-hydroxytamoxifen has no intrinsic cytotoxicity at the concentrations used.** SV40-immortalized WT MEF and FDM were treated with various concentrations of 4-hydroxytamoxifen (4-OHT) and cellular viability determined over time by FACS analysis (GFP-AnnexinV/PI exclusion). No cytotoxicity was detectable at 0.1 μM 4-OHT, the concentration used to induce protein expression, or even at a ten-fold higher concentration of 1.0 μM. Data are presented as means +/- SD from 3 independent experiments.
