# Supplementary material
Source: PubMed Central journal article supplement (PMC3647236)
Supplement: cdd201310x7.pdf [file cdd201310x7.pdf]

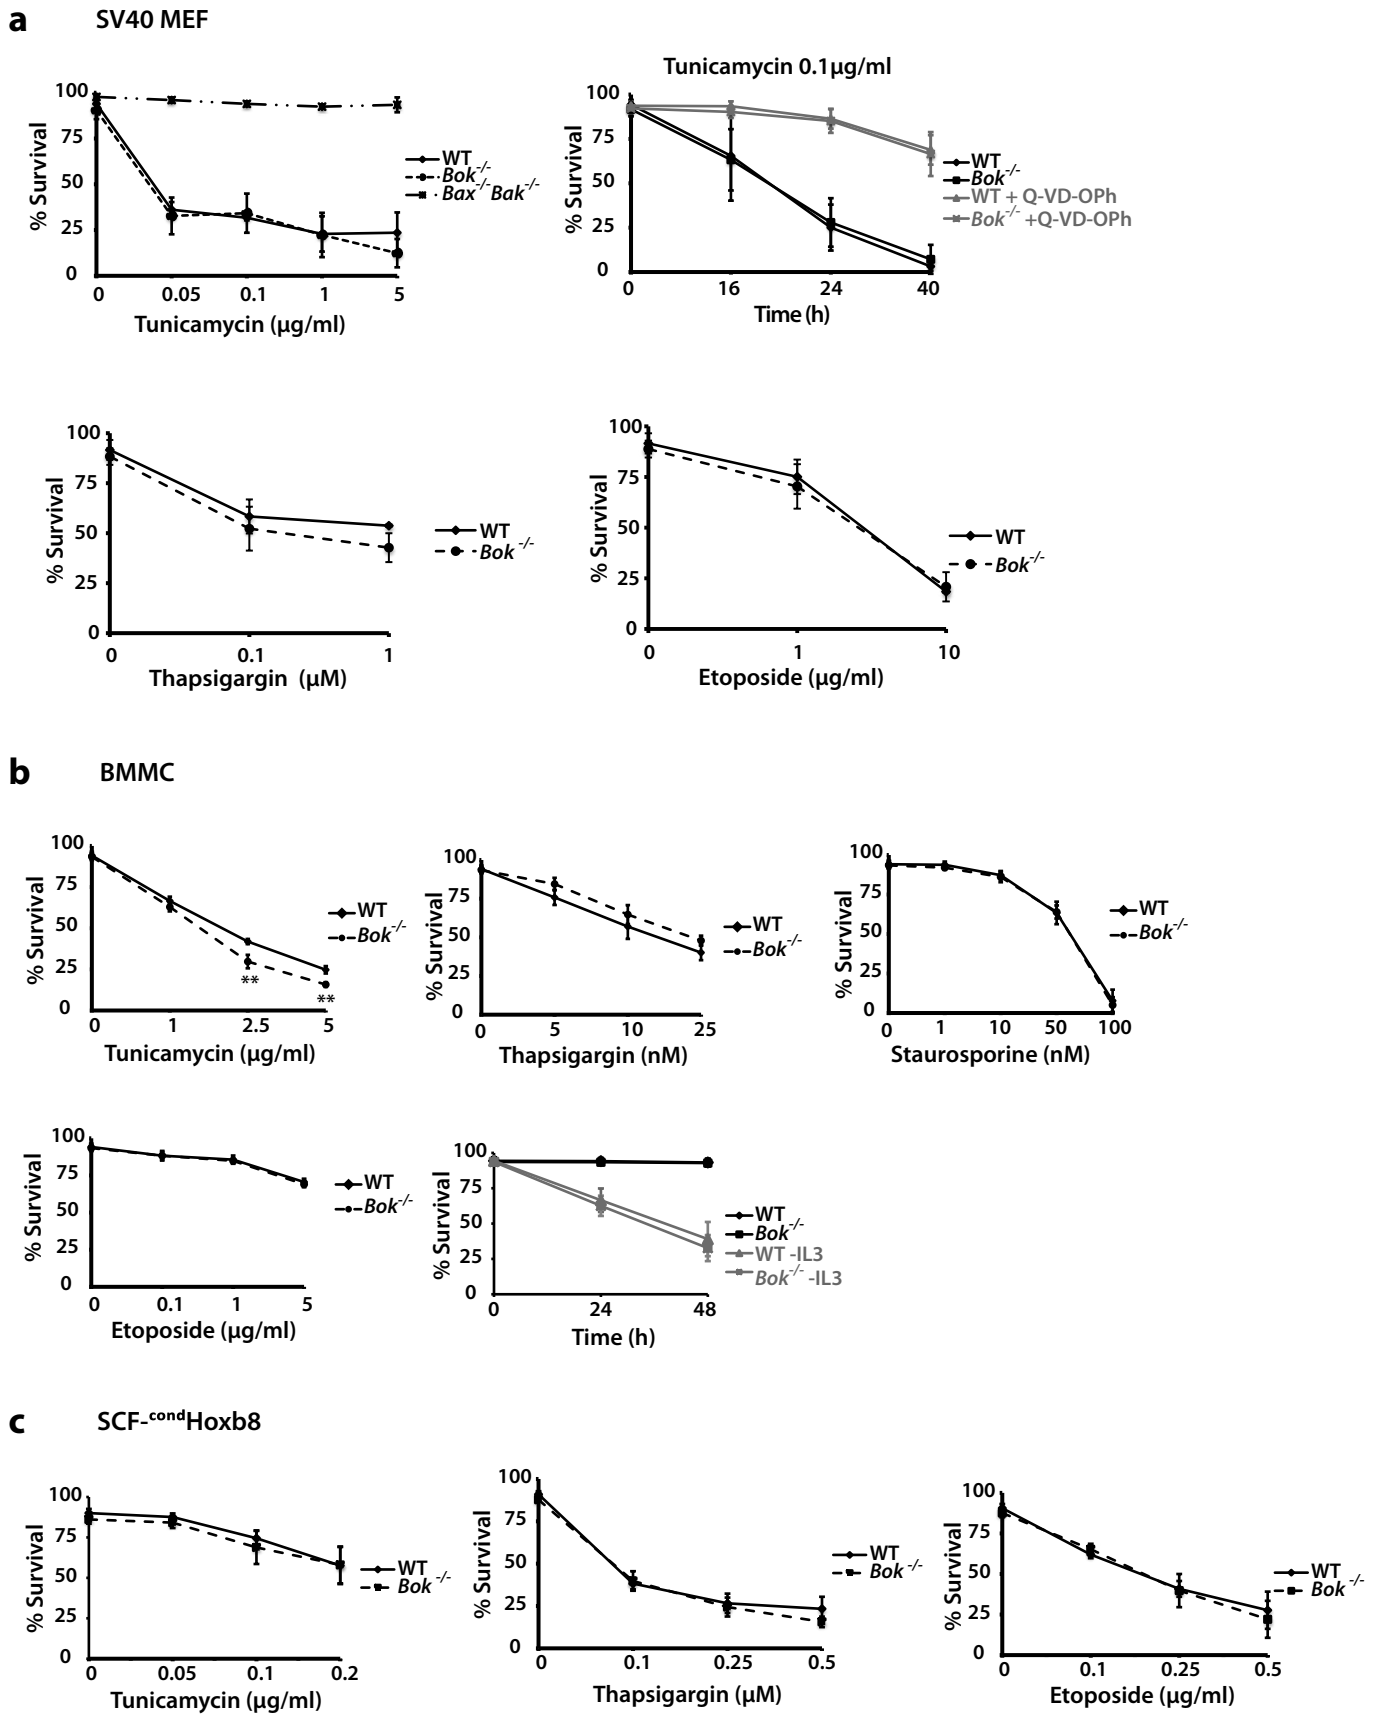

**Supplementary Figure S6. BOK-deficient cells respond normally to classical apoptotic stimuli.** (a) SV40 immortalized WT and *Bok*<sup>-/-</sup> MEF were treated with the indicated doses of tunicamycin, thapsigargin or etoposide for 24 h (dose responses). Cell survival was also examined over a period of 40 h for treatment with 0.1 µg/mL tunicamycin, in the presence or absence of 25 µM Q-VD-OPh. (b) WT and *Bok*<sup>-/-</sup> bone marrow derived mast cells (BMMC) were treated with various doses of tunicamycin, thapsigargin, etoposide or staurosporine for 24 h. Apoptosis was also induced by withdrawal of IL-3 for 24 or 48 h. (c) WT and *Bok*<sup>-/-</sup> SCF-*cond*Hoxb8 immortalized myeloid progenitors were treated with tunicamycin, thapsigargin or etoposide for 18 h. Cell survival data (a-c) are shown as percentage of GFP-Annexin V/PI double-negative cells and presented as means  $\pm$  SD of at least three independent experiments. Significance was determined by unpaired student's t-Test (\*\* $p < 0.01$ ).
