# Supplementary material
Source: PubMed Central journal article supplement (PMC3647236)
Supplement: cdd201310x8.pdf [file cdd201310x8.pdf]

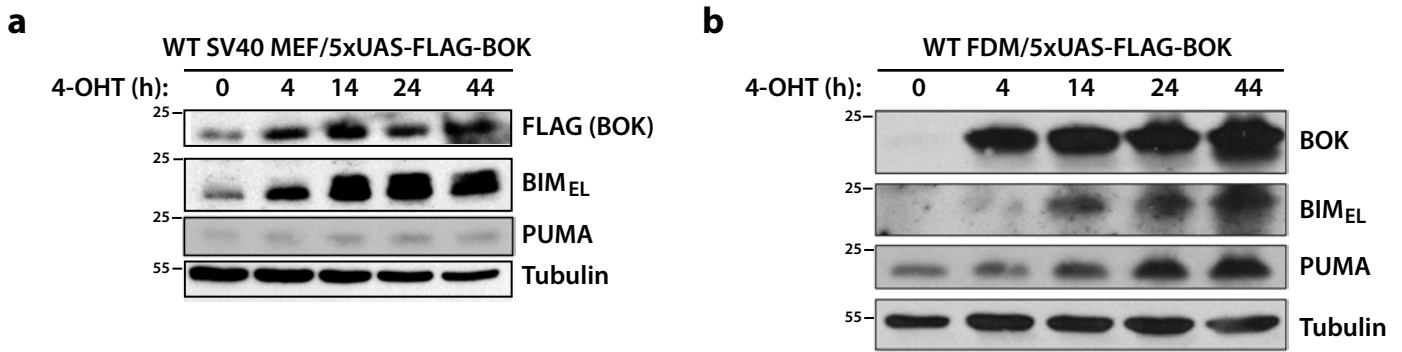

**Supplementary Figure S7. Enforced expression of FLAG-BOK leads to upregulation of the BH3-only proteins BIM and PUMA.** SV40-immortalized WT MEF/5xUAS-FLAG-BOK (**a**) or WT FDM/5xUAS-FLAG-BOK (**b**) cells were treated with 0.1  $\mu$ M 4-OHT to induce FLAG-BOK expression. Total protein lysates were prepared at the indicated times and analyzed by Western blotting using antibodies against FLAG, BOK, BIM and PUMA. Re-probing of the membrane with an anti-Tubulin antibody served as loading control.
